# Supplementary material
Source: MDPI journal article supplement (https://www.mdpi.com/2073-4395/8/4/47)
Supplement: s1 [file s1]

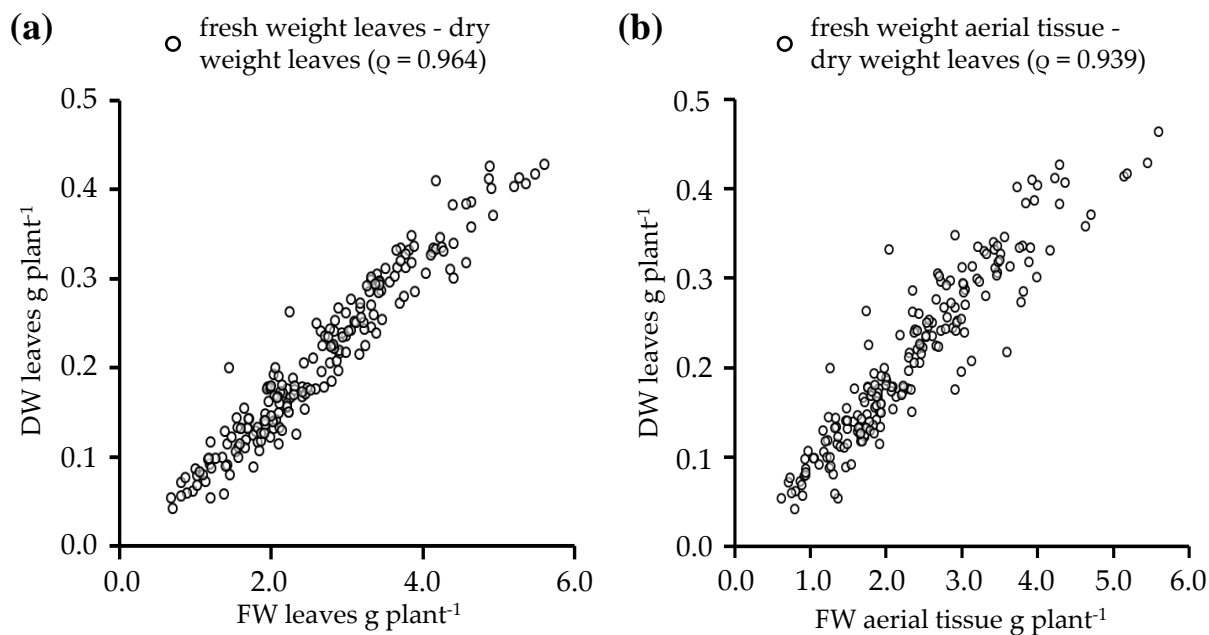

**Supplemental figure 1:** Relationship between the fresh weight (FW) of the leaves per plant **(a)** or FW of the aerial tissue per plant **(b)** and the dry weight (DW) of the leaves per plant of 185 individual genotypes harvested at end of day (ED). The Spearman-rank correlation coefficient ( $\rho$ ) is indicated. Fresh weight (FW) of the aerial tissue in **(b)** is the same as described in Figure 5.

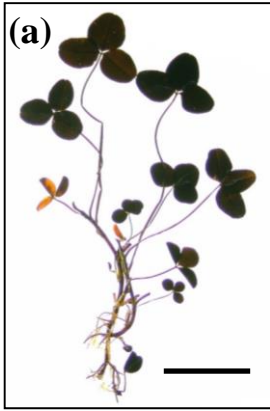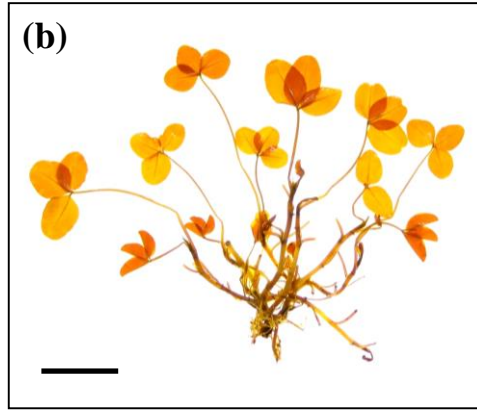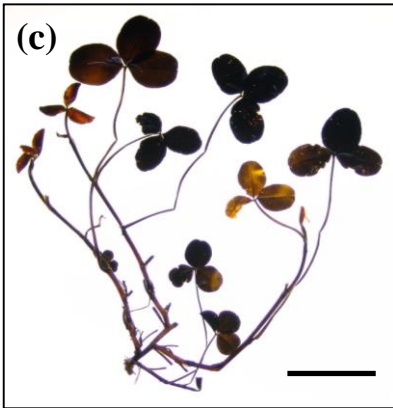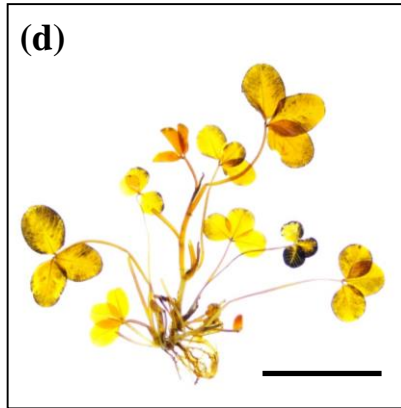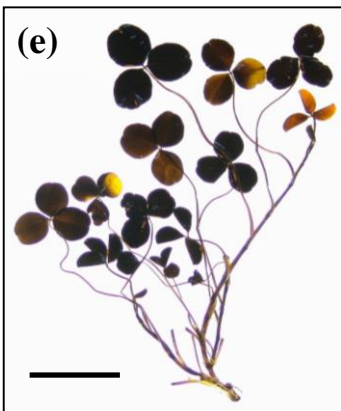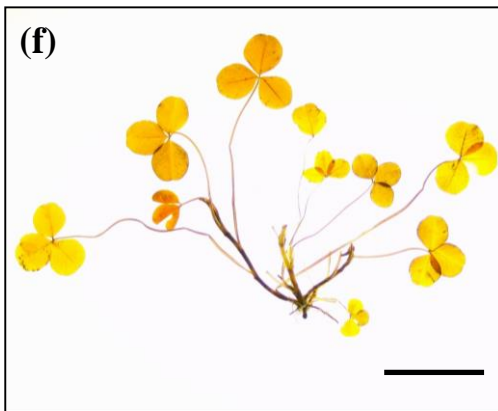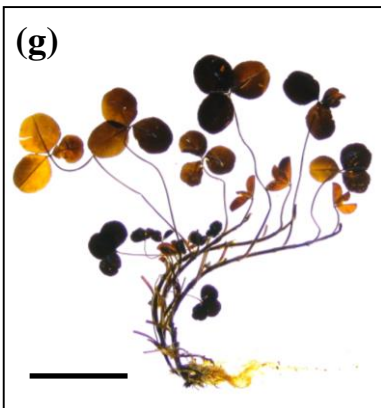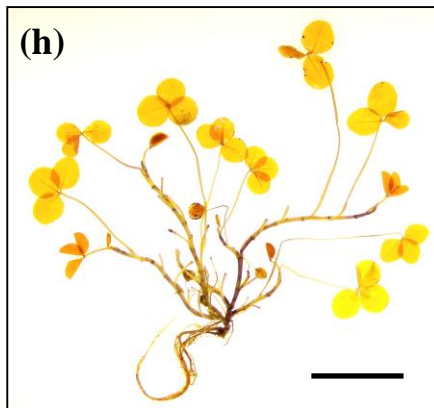

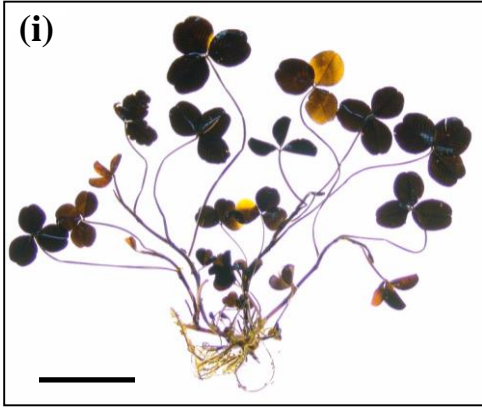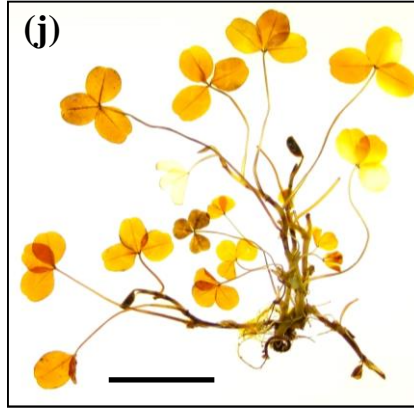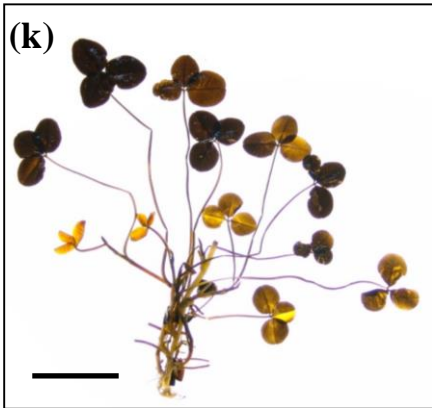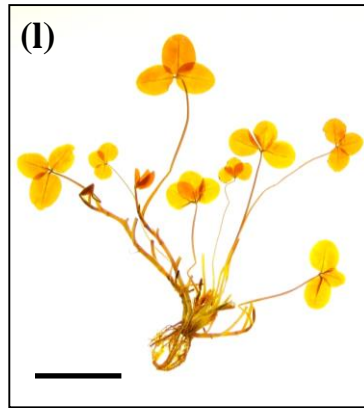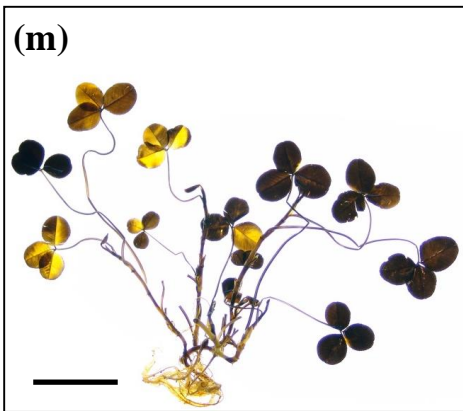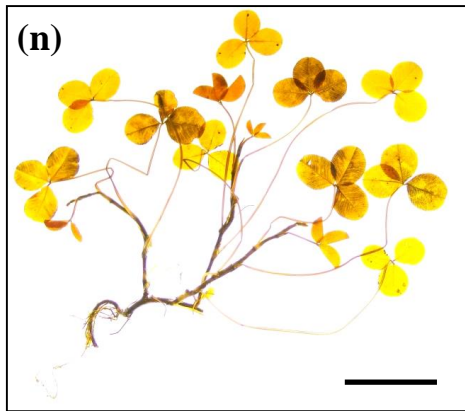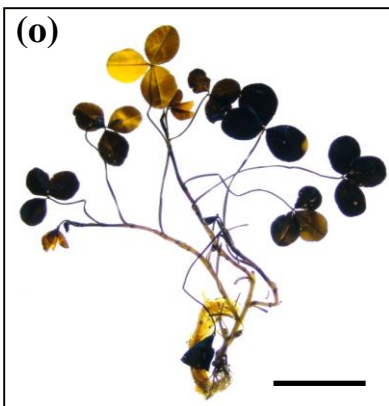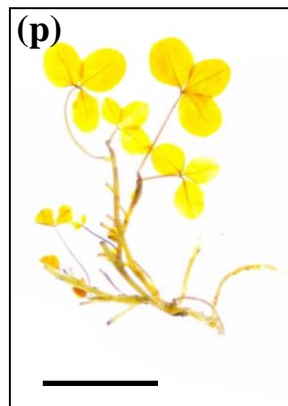

**Supplemental figure 2:** Staining of starch in white clover leaves at the end of the day (ED) and at the end of the night (EN) shows different patterns of localization across genotypes. Starch is indicated by the dark purple to black color in the leaves. Genotypes *TrLB003* (a), *TrLb170* (c), *TrLB176* (e), *TrLB070* (g), *TrLB184* (i), *TrLB082* (k), *TrLB114* (m), and *TrLB115* (o) stained at ED. Genotypes *TrLB003* (b), *TrLb170* (d), *TrLB176* (f), *TrLB070* (h), *TrLB184* (j), *TrLB082* (l), *TrLB114* (n), and *TrLB115* (p) stained at EN. Bars = 5cm.

**Supplemental Table S1:** *F*-values, levels of significance and proportion of phenotypic variance ( $R^2$ ) explained by ANOVA for the evaluation of the glasshouse effect on WSC and starch at ED and EN. The table corresponds to the ANOVA evaluation of the measurements described in Figure 2. \*  $p < 0.01$

|                         | Glucose | Fructose | Sucrose | Starch |
|-------------------------|---------|----------|---------|--------|
| <b>Glasshouse ED df</b> | 2       | 2        | 2       | 2      |
| <b>Error ED df</b>      | 181     | 181      | 182     | 182    |
| <b>SS Error ED</b>      | 75.2    | 64.5     | 36.6    | 19.5   |
| <b>SS Total ED</b>      | 79.6    | 66.1     | 38.2    | 20.4   |
| <b>F - value ED</b>     | 5.33*   | 2.26     | 3.87    | 4.26   |
| <b>R<sup>2</sup> ED</b> | 0.0556  | 0.0244   | 0.0407  | 0.0448 |
| <b>Glasshouse EN df</b> | 2       | 2        | 2       | 2      |
| <b>Error EN df</b>      | 136     | 110      | 136     | 175    |
| <b>SS Error EN</b>      | 55.7    | 81.1     | 59.2    | 95.0   |
| <b>SS Total EN</b>      | 58.8    | 100      | 76.8    | 36.1   |
| <b>F - value EN</b>     | 3.43    | 13.2*    | 20.2*   | 15.8*  |
| <b>R<sup>2</sup> EN</b> | 0.048   | 0.193    | 0.229   | 0.153  |

**Supplemental Table S2:** *F*-values, levels of significance and proportion of phenotypic variance explained ( $R^2$ ) by ANOVA for the evaluation of the genotype effect on WSC and starch. The table corresponds to the ANOVA evaluation of the measurements described in Figure 6 and Table 1. \*  $p < 0.01$

|                         | Glucose | Fructose | Sucrose | Starch | Biomass |
|-------------------------|---------|----------|---------|--------|---------|
| <b>Genotype ED df</b>   | 11      | 11       | 11      | 11     | 11      |
| <b>Error ED df</b>      | 77      | 77       | 77      | 78     | 78      |
| <b>SS Error ED</b>      | 41.2    | 81.8     | 395     | 21700  | 0.854   |
| <b>SS Total ED</b>      | 68.8    | 158      | 567     | 74900  | 1.33    |
| <b>F - value ED</b>     | 4.70*   | 6.51*    | 3.04*   | 17.4*  | 3.91*   |
| <b>R<sup>2</sup> ED</b> | 0.402   | 0.482    | 0.303   | 0.790  | 0.356   |
| <b>Genotype EN df</b>   | 11      | 11       | 11      | 11     | 11      |
| <b>Error EN df</b>      | 75      | 75       | 75      | 74     | 75      |
| <b>SS Error EN</b>      | 85.9    | 33.0     | 185     | 694    | 0.330   |
| <b>SS Total EN</b>      | 104     | 41.3     | 251     | 1104   | 0.529   |
| <b>F - value EN</b>     | 1.44    | 1.70     | 2.44    | 3.97*  | 4.13*   |
| <b>R<sup>2</sup> EN</b> | 0.175   | 0.199    | 0.264   | 0.371  | 0.377   |
